# Supplementary material for: Piece of Cake: Coping with COVID-19
Source: MDPI journal article supplement (doi:10.3390/nu12123803), 2020-12-11
Supplement: s1 [file s1]

**Table S1.** Distribution of recruitment methods for participants included in the survey ( $n = 680$ ).

| Recruitment method                                | Number of participants (%) |
|---------------------------------------------------|----------------------------|
| Email                                             | 283 (41.6%)                |
| Social media (e.g., Facebook, Instagram, Twitter) | 157 (23.1%)                |
| MTurk                                             | 91 (13.4%)                 |
| Research website                                  | 6 (0.9%)                   |
| Online classifieds (e.g., Reddit, Kijij)          | 1 (0.1%)                   |
| Other                                             | 119 (17.5%)                |
| Did not specify                                   | 23 (3.4%)                  |

**Table S2.** Number of participants recruited but excluded from the survey ( $n = 101$ ).

| Reason for exclusion                                                                                       | Number of participants (%) |
|------------------------------------------------------------------------------------------------------------|----------------------------|
| One or more questions unanswered                                                                           | 43 (42.6%)                 |
| Selected <i>Other</i> when asked:<br><i>How did your employment status change as a result of COVID-19?</i> | 28 (27.7%)                 |
| Withdrew from survey                                                                                       | 16 (15.8%)                 |
| BMI is < 15 or > 55                                                                                        | 11 (10.9%)                 |
| Survey was completed in under < 5 minutes                                                                  | 2 (2.0%)                   |
| Responded <i>No</i> when asked:<br><i>I provided honest, high-quality answers to the survey questions</i>  | 1 (1.0%)                   |

**Table S3.** Highest level of education completed by participants ( $n = 680$ ).

| Education level                       | Number of participants (%) |
|---------------------------------------|----------------------------|
| <b>High school or less</b>            |                            |
| No or some high school completed      | 3 (0.4%)                   |
| High school diploma                   | 91 (13.4%)                 |
| <b>Post-secondary education</b>       |                            |
| College/university credit, no diploma | 112 (16.5%)                |
| Trade/technical/vocational training   | 25 (3.7%)                  |
| Associate degree                      | 17 (2.5%)                  |
| Bachelor's degree                     | 247 (36.3%)                |
| Master's degree                       | 96 (14.1%)                 |
| Professional degree                   | 25 (3.7%)                  |
| Doctorate degree                      | 47 (6.9%)                  |
| <b>Other</b>                          | 17 (2.5%)                  |

**Table S4.** Means (SD)/ *n* (percent of participant) associated with participants who experienced “No change” in employment.

|                                        | <b>Employed</b><br>( <i>n</i> = 266) | <b>Unemployed</b><br>( <i>n</i> = 65) | <b>Retired</b><br>( <i>n</i> = 51) | <b>Other</b> <sup>4</sup><br>( <i>n</i> = 7) |
|----------------------------------------|--------------------------------------|---------------------------------------|------------------------------------|----------------------------------------------|
| <b>Age</b> <sup>1</sup>                | 38.31 (12.04) <sub>a</sub>           | 28.71 (11.76) <sub>b</sub>            | 68.14 (7.53) <sub>c</sub>          | 37.86 (9.58) <sub>a,b</sub>                  |
| <b>Income</b> <sup>1,2</sup>           | 5.94 (2.23)                          | 5.28 (2.58)                           | 5.38 (1.82)                        | 6.43 (2.07)                                  |
| <b>Gender</b> <sup>3</sup>             |                                      |                                       |                                    |                                              |
| Female                                 | 188 (70.7%)                          | 51 (78.5%)                            | 44 (86.3%)                         | 7 (100%)                                     |
| Male                                   | 75 (28.2%)                           | 11 (16.9%)                            | 7 (13.7%)                          | 0 (0%)                                       |
| <b>Education</b> <sup>3</sup>          |                                      |                                       |                                    |                                              |
| High school or less                    | 19 (7.1%)                            | 17 (26.2%)                            | 1 (2%)                             | 0 (0%)                                       |
| Some post-secondary                    | 245 (92.1%)                          | 48 (73.8%)                            | 50 (98%)                           | 7 (100%)                                     |
| <b>Living arrangement</b> <sup>3</sup> |                                      |                                       |                                    |                                              |
| Alone                                  | 46 (17.3%)                           | 7 (10.8%)                             | 20 (39.2%)                         | 0 (0%)                                       |
| With others                            | 133 (50%)                            | 51 (78.5%)                            | 21 (41.2%)                         | 0 (0%)                                       |
| Others with children                   | 78 (29.3%)                           | 6 (9.2%)                              | 10 (19.6%)                         | 6 (85.7%)                                    |
| Alone with children                    | 9 (3.4%)                             | 1 (1.5%)                              | 0 (%)                              | 1 (14.3%)                                    |
| <b>National location</b> <sup>3</sup>  |                                      |                                       |                                    |                                              |
| Canada                                 | 194 (72.9%)                          | 60 (92.3%)                            | 47 (92.2%)                         | 7 (100%)                                     |
| United States                          | 72 (27.1%)                           | 5 (7.7%)                              | 4 (7.8%)                           | 0 (0%)                                       |

<sub>a,b,c</sub> Columns with different subscripts differ significantly from one another at  $p < 0.05$ .

<sup>1</sup> Analyzed with ANOVA.

<sup>2</sup> Income codes reflect brackets of annual income ranging from 1 (< \$15,000) to 8 (> \$105,000). Thus, sample income means in each column were between 5 (\$60,000–\$74,999) and 6 (\$75,000–\$89,999).

<sup>3</sup> Analyzed with the chi-square test.

<sup>4</sup> Includes individuals specifying long term leave, e.g., disability or maternity leave.
